# Supplementary material
Source: PubMed Central journal article supplement (PMC5789934)
Supplement: pnas.1715954115.sapp.pdf [file pnas.1715954115.sapp.pdf]

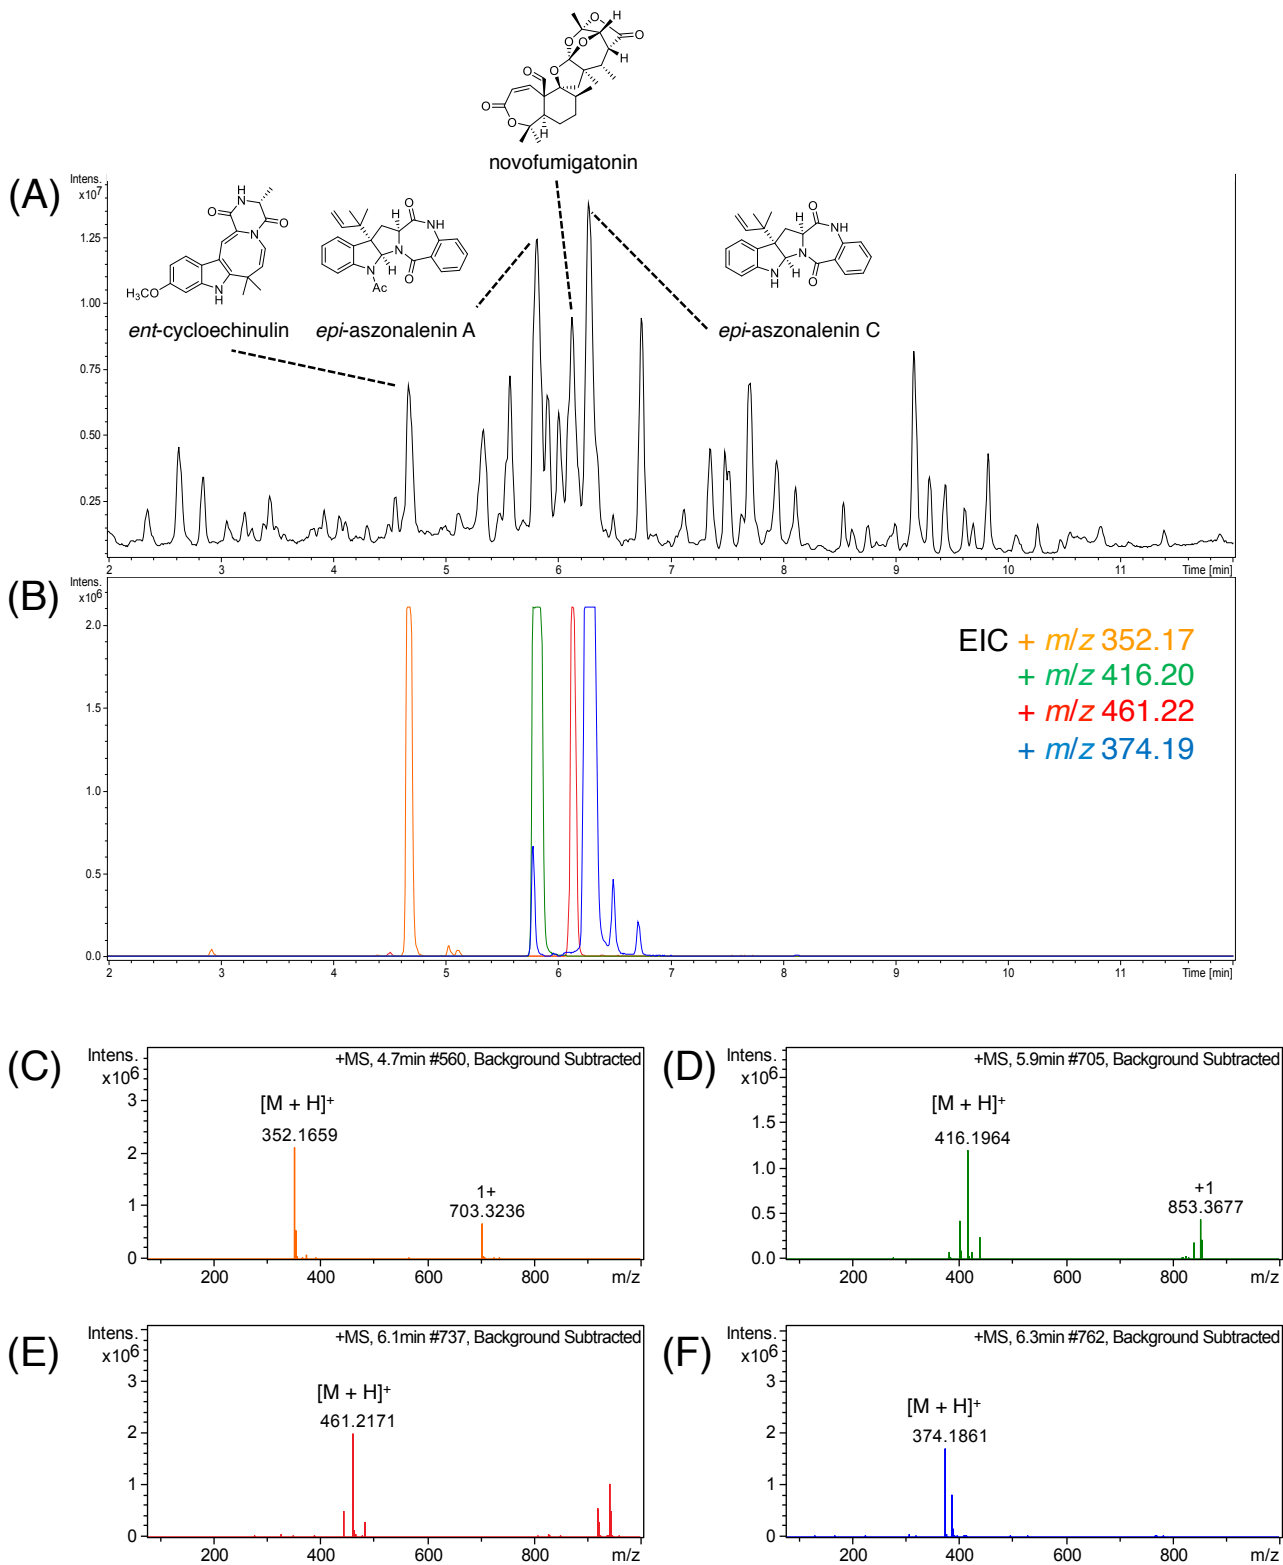

**Figure S1** LC-MS analysis of the metabolites from *Aspergillus novofumigatus* IBT 16806 cultivated on YES agar medium. (A) Total and (B) extracted ion chromatograms, and mass spectra of (C) *ent*-cycloechinulin, (D) *epi*-aszonalenin A, (E) novofumigatonin, and (F) *epi*-aszonalenin C.

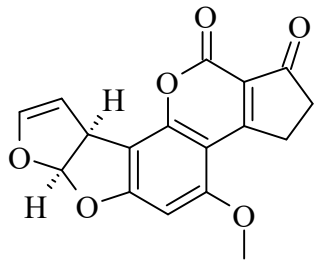

Aflatoxin B1

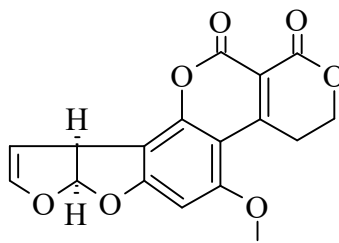

Aflatoxin G1

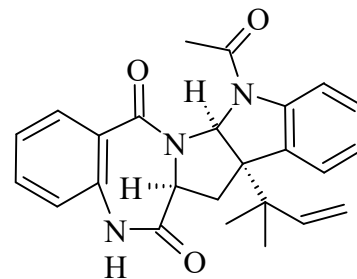

*epi*-aszonalenin A

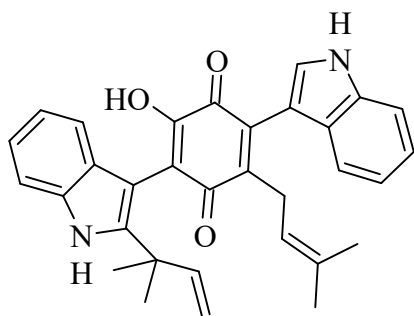

Terrequinone

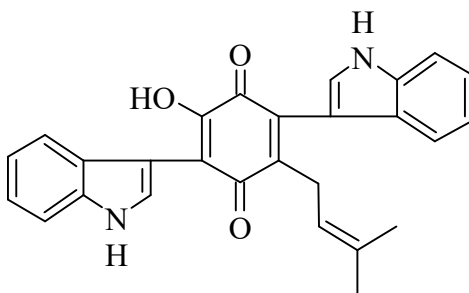

Ochridole D

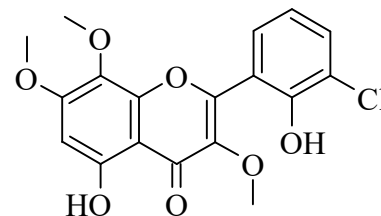

Chlorflavonin

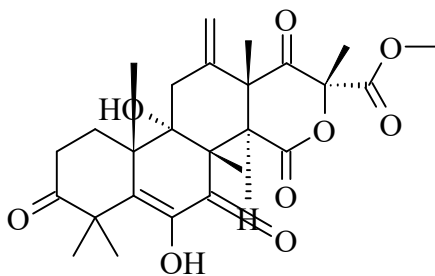

Terretonin

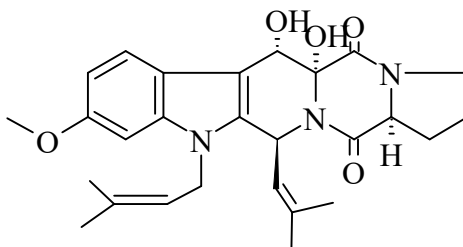

Fumitremorgin B

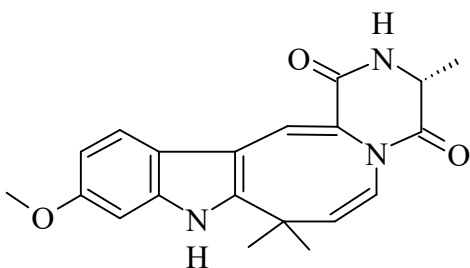

*ent*-cycloechinulin

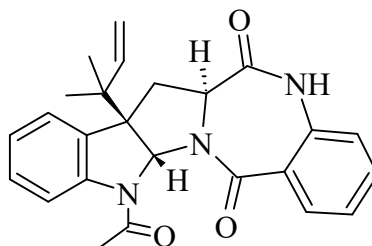

Acetylaszonalenin

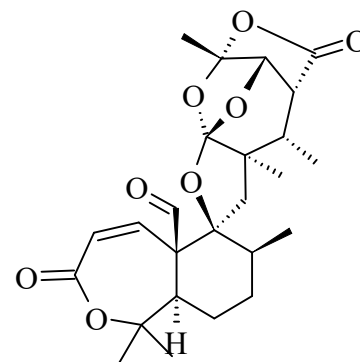

Novofumigatonin

**Figure S2** Overview of the chemical structures of compounds mentioned in the article (Aflatoxin B1 and G1, *epi*-aszonalenin A, terrequinone, ochridole D, chlorflavonin, terretonin, fumitremorgin B, *ent*-cycloechinulin, acetylaszonalenin and novofumigatonin).

## SI Text

### Part 1: Materials and Methods

#### Strains:

**A. campestris** (CBS 348.81 = IBT28561, NCBI Taxonomy ID: 1392248) was first isolated in 1979 from soil collected in northern North Dakota. Initially it was placed in the *ochraceus* group (section *Circumdati*) [1]. This was however only based on morphology. In 2000 Rahbæk et al. suggested that *A. campestris* should be placed in section *Candidi* based on chemotaxonomical evidence [2]. In an investigation of section *Candidi* it was further consolidated that *A. campestris* belongs to this section based on among other phylogenetic studies of the calmodulin and  $\beta$ -tubulin genes [3]. *A. campestris* is known to produce a range of interesting chemical compounds including, candidusin C, terphenyllin and chlorflavonin [2, 3].

**A. novofumigatus** (CBS 117520 = IBT16806, NCBI Taxonomy ID: 1392255) was originally isolated from Californian chamise chaparral soil collected in 1965. It is closely related to the pathogenic species *A. fumigatus* and belongs to the section *Fumigati*. It was initially suggested to be a separate species in 2005, this was mainly based on phylogenetic studies of the beta-tubulin, calmodulin and actin genes and on the extrolite profile [4]. *A. novofumigatus* has been recorded in one instance of aspergillosis along with another species in a patient with leukaemia [5].

**A. ochraceoroseus** (IBT 24754 = CBS 550.77, NCBI Taxonomy ID: 1392256) was first isolated from soil from the Tai national Park in the Ivory Coast in 1978 and based on the morphology it was assigned to the *ochraceus* group (section *Circumdati*) [6]. Looking at the phylogeny of several housekeeping genes and the extrolite profile *A. ochraceoroseus* it is more closely related to subgenus *Nidulantes* and *Veriscolores* [7]. Currently it is believed to be a member of section *Ochraceorosei* [8, 9].

**A. steynii** (IBT 23096 = CBS 112812, NCBI Taxonomy ID: 1392250) has been isolated from Arabica green coffee bean from India. It belongs to section *Circumdati* and is closely related to *A. elegans*. *A. steynii* is important in food spoilage since it is known to produce ochratoxin A in addition to several other extrolites [10, 11].

*A. candidus* (CBS 102.13 = IBT 13984) was isolated in Japan and belongs to section *Candidi* [2, 3].

*A. taichungensis* (NCBI 482145 =IBT19404, NCBI Taxonomy ID: 482145) was isolated from Soil in Taiwan and belongs to section *Candidi* [2, 3].

The strains used in this study can be seen in Table 1.

**Table 1** The species with whole genome sequences used in this study.

| Species                                     | Collection number         | JGI abbreviation | Reference                                                                               |
|---------------------------------------------|---------------------------|------------------|-----------------------------------------------------------------------------------------|
| <i>A. campestris</i>                        | CBS 348.81<br>= IBT28561  | Aspcam1          | This study                                                                              |
| <i>A. novofumigatus</i>                     | CBS 117520<br>= IBT16806  | Aspnov1          | This study                                                                              |
| <i>A. ochraceoroseus</i>                    | CBS 550.77<br>= IBT 24754 | Aspoch1          | This study                                                                              |
| <i>A. steynii</i>                           | CBS 112812<br>= IBT 23096 | Aspste1          | This study                                                                              |
| <i>A. candidus</i>                          | CBS 102.13<br>= IBT 13984 | Aspcan1          | This study                                                                              |
| <i>A. taichungensis</i>                     | NCBI 482145<br>=IBT19404  | Asptaic1         | This study                                                                              |
| <i>A. oryzae</i>                            | RIB40                     | Aspor1           | [12, 13]                                                                                |
| <i>A. flavus</i>                            | NRRL3357                  | Aspfl1           | [12]                                                                                    |
| <i>A. nidulans</i>                          | FGSC A4                   | Aspnid1          | [12, 14]                                                                                |
| <i>A. niger</i>                             | ATCC 1015                 | Aspni7           | [15]                                                                                    |
| <i>A. fumigatus</i> Af293                   | FGSC A1100                | Aspfu1           | [16]                                                                                    |
| <i>A. fumigatus</i> A1163                   | FGSC A1163                | Aspfu_A1163_1    | [16–19]                                                                                 |
| <i>N. fischeri</i> / <i>A. fischerianus</i> | NRRL 181                  | Neofi1           | [12, 20]                                                                                |
| <i>A. clavatus</i>                          | NRRL 1                    | Aspcl1           | [12]                                                                                    |
| <i>A. terreus</i>                           | NIH2624                   | Aspte1           | [12]                                                                                    |
| <i>N. crassa</i>                            | OR74A                     | Neucr2           | [21]                                                                                    |
| <i>P. chrysogenum</i>                       |                           | Pench1           | These sequence data were produced by the US Department of Energy Joint Genome Institute |

|  |  |  |                                                                                                         |
|--|--|--|---------------------------------------------------------------------------------------------------------|
|  |  |  | <a href="http://www.jgi.doe.gov/">http://www.jgi.doe.gov/</a> in collaboration with the user community. |
|--|--|--|---------------------------------------------------------------------------------------------------------|

### Growth of strains and DNA extraction

Biomass for all fungal strains was obtained from shake flasks containing 200ml of complex media CYA [22]. Biomass was isolated by filtering through Miracloth (Millipore, 475855-1R), freeze dried, and stored at -80C. Subsequently, a sample of frozen biomass was used for RNA purification. First hyphae were lysed in a 2ml micro tube, together with a 5mm Steel bead (QIAGEN), placed in liquid nitrogen by using the QIAGEN TissueLyser LT at 45 Hz for 50 seconds. Then the QIAGEN RNeasy mini Plus Kit was used, and the RLT Plus buffer (with 2-mercaptoethanol) was added to the samples, vortexed and spun down. The lysate was then used in step 4 in the instructions provided by the manufacturer, and the protocol was followed from this step. For genomic DNA a protocol inspired by Fulton et al. [23] was used. For details see Additional file 8.

**Genome sequencing and assembly.** *A. campestris*, *A. novofumigatus*, *A. ochraceoroseus* and *A. steynii* were whole-genome sequenced using PacBio RS and assembled using Hierarchical-Based Assembler (HBAR) which is a developing version derived from Hierarchical Genome Assembly Process (HGAP) [24] allowing larger genomes to be processed.

Unamplified libraries were generated using Pacific Biosciences standard template preparation protocol for creating >10kb libraries. 5ug of gDNA was used to generate each library and the DNA was sheared using Covaris g-Tubes to generate sheared fragments of >10kb in length. A modified version of the protocol was used for 5kb PacBio libraries using a Covaris LE220 focused-ultrasonicator with their Red miniTUBES for DNA shearing. The sheared DNA fragments were then prepared using Pacific Biosciences SMRTbell template preparation kit, where the fragments were treated with DNA damage repair, had their ends repaired so that they were blunt-ended, and 5' phosphorylated. Pacific Biosciences hairpin adapters were then ligated to the

fragments to create the SMRTbell template for sequencing. The SMRTbell templates were then purified using exonuclease treatments and size-selected using AMPure PB beads. Sequencing primer was then annealed to the SMRTbell templates and Version P4 sequencing polymerase was bound to them. The prepared SMRTbell template libraries were then sequenced on a Pacific Biosciences RSII sequencer using Version C2 chemistry and 2 hour sequencing movie run times. Genomes of *A. campestris*, *A. novofumigatus*, *A. ochraceoroseus* and *A. steynii* were assembled using HBAR (<https://github.com/PacificBiosciences/HBAR-DTK>) and polished with quiver.

*A. candidus* and *A. taichungensis* were whole-genome sequenced using Illumina. 100ng of DNA was sheared to 270bp using the Covaris LE220 (Covaris) and size selected using SPRI beads (Beckman Coulter). The fragments were treated with end-repair, A-tailing, and ligation of Illumina compatible adapters (IDT, Inc) using the KAPA-Illumina library creation kit (KAPA biosystems). qPCR was used to determine the concentration of the libraries. Libraries were sequenced on the Illumina Hiseq in 2x150bp format.

The assemblies were produced using combination of Velvet and AllPathsLG v.R47710 assemblers. The raw fastq file was QC filtered to remove artifact/process contamination and then separated into two fastq files, one with mitochondrial data only and the remainder in the target fastq. The target fastq was subsequently assembled using Velvet [25]. The resulting assembly was used to create a long mate-pair library with insert 3000 +/- 90 bp which was then assembled together with the target fastq using AllPathsLG release version R47710, [26].

### **Transcriptome sequencing and assembly**

Stranded cDNA libraries were generated using the Illumina Truseq Stranded RNA LT kits. mRNA was purified from 1µg (100ng for WPOO) of total RNA using magnetic beads containing poly-T oligos. mRNA was fragmented using divalent cations and high temperature. The fragmented RNA was reversed transcribed

using random hexamers and SSII (Invitrogen) followed by second strand synthesis. The fragmented cDNA was treated with end-pair, A-tailing, adapter ligation, and 10 (12 for WPOO) cycles of PCR. qPCR was used to determine the concentration of the libraries. Libraries were sequenced on the Illumina HiSeq. Illumina reads of stranded RNA-seq data were used as input for de novo assembly of RNA contigs. Reads were assembled into consensus sequences using Rnnotator (v. 3.3.1 or later), which consists of three major components: preprocessing of reads, assembly, and postprocessing of contigs [27].

**Genome annotation.** Annotation of the genomes was completed using the JGI annotation pipeline and made publicly available via JGI fungal genome portal MycoCosm [28, 29].

Also the software tool Secondary Metabolite Unknown Regions Finder (SMURF) was used to predict secondary metabolite gene clusters (SMGC) in the genomes [30].

Sequences were analysed using InterProScan5 in order to investigate potential protein functions [31].

**BLASTP.** Each protein in each of the genomes has been compared to all other proteins using the BLASTP function from the BLAST+suite version 2.2.27 with a non-restrictive e-value cutoff of  $10^{10}$  [32, 33].

**Phylogenetic analysis – CVTree.** A phylogenetic tree was constructed using the Composition Vector approach. The web based server CVTree3 was used (<http://tlife.fudan.edu.cn/archaea/cvtree/cvtree3/>) [34, 35]. The proteome for each of the species were uploaded in fasta format and the K-tuple length was set to 8 and then the project as run resulting in a phylogenetic tree. The tree was visualized using FigTree v1.4.2 (<http://tree.bio.ed.ac.uk/software/figtree/>).

#### **Identification of species-specific genes**

All predicted sets of protein sequences for the 4 genomes in this paper (*A. campestris*, *A. novofumigtus*, *A.*

ochraceoroseus, *A. steynii*) and the nine reference genomes (*A. nidulans*, *A. oryzae*, *A. flavus*, *A. niger*, *A. fumigatus Af293*, *A. fumigatus A1163*, *N. fischeri*, *A. clavatus*, *A. terreus*), and two outgroup species (*N. crassa* and *P. chrysogenum*) were aligned using the BLASTp function from the BLAST+ suite version 2.2.27 with an e-value  $\leq 10^{-10}$  [32, 33]. These 225 whole-genome BLAST tables were analyzed to identify bi-directional hits in all pairwise comparisons. Using custom Python-scripts, paralogs were first identified within the same genome and grouped into sequence similar families using single linkage, meeting the criterion; the sum of the alignment coverage between the pairwise sequences  $\geq 130\%$ , the alignment identity between the pairwise sequences  $\geq 50\%$ , and the pairwise hit must be bi-directional (present in both BLAST directions). The orthologs were identified across genomes and grouped into sequence similar families using single linkage meeting the same criterions. Singletons were assigned a family having only one gene member. This allowed for identification of species unique genes. All homologs were assigned functional and structural domains using InterPro version 48 [36, 37] and checked for annotation and sequencing errors by investigating scaffold location and sequence identity.

### **N6-methyldeoxyadenine analysis**

Modification detection was performed using single-molecule real-time (SMRT) sequencing and the PacBio SMRT Analysis 2.3.0 toolkit [38]. Following modification detection, 6mA sites were filtered following Mondo et al., 2017, which includes filtering modifications by both coverage (minimum 15x, maximum determined using the R-boxplot function) and modification quality value (mQV; minimum mQV = 25).

**Synteny plots of SMGC – Easyfig.** Synteny plots were made using Easyfig version 2.1 (<http://easyfig.sourceforge.net>) [39]. All GenBank files describing the clusters to be compared were uploaded. The tBLASTx option was used with an  $e\text{-}\leq 0.001$ , an alignment length  $\geq 50$  and an alignment identity  $\geq 35$ . Length of scale was set to 2000 bp under the figure option. If necessary, the sequence can be



reversed under the sub region options. After the options have been set the figure can be created choosing vector format (svg).

### **Homology of *A. novofumigatus* and *A. fumigatus***

The number of proteins from *A. novofumigatus* with homologs in *A. fumigatus* was determined based on BLASP hit with identity  $\geq 50\%$  and the sum of the query and hit coverage  $\geq 130\%$ .

### **Synteny of *A. novofumigatus* and *A. fumigatus***

The synteny between *A. novofumigatus* and *A. fumigatus* was determined using MUMmer (<http://mummer.sourceforge.net>) [40–42]. ‘NUCmer’ (NUCleotide MUMmer) was used with standard setting to generate alignments between the two species, followed by ‘show-coords’ to generate a file with the output from where the total coverage of the genome, maximum block length and mean block length could be calculated based on the *A. novofumigatus* length of the alignments.

### **Comparison of *A. fumigatus* and *A. novofumigatus* secondary metabolite gene clusters**

Comparison of the best hits for *A. fumigatus* and *A. novofumigatus* secondary metabolite gene clusters in other species, based on average percent identity of the backbone proteins. First, BLASTP comparisons of all *A. fumigatus* and *A. novofumigatus* SMGC backbone proteins against all SMGC backbone proteins from the dataset were created. Subsequently, an average of backbone proteins identity was calculated per cluster, the best hit is shown in the heatmap. Backbone proteins are defined as proteins with the annotations PKS(-like), NRPS(-like), hybrid, DMATS and TC.

### **LC-MS analysis of metabolites from *A. novofumigatus* IBT 16806**

*Aspergillus novofumigatus* IBT 16806 was cultivated on YES agar plate at 25 °C for 7 days, and extracted with ethyl acetate containing 1% formic acid. The extract for LC-MS analysis were injected into a Dionex Ultimate 3000 UHPLC system (Thermo Scientific) - a maXis 3G QTOF orthogonal mass spectrometer (Bruker Daltonics), using Electrospray Ionization with a Kinetex C<sub>18</sub> column (2.1 i.d. x 100 mm; Phenomenex). Separation was performed with a solvent system of water containing 20 mM formic acid (solvent A) and acetonitrile containing 20 mM formic acid (solvent B), at a flow rate of 0.4 ml/min and a column temperature of 40 °C, using the following program: a linear gradient from 10:90 (solvent B/solvent A) to 100:0 for 10 min, 100:0 for the following 3 min, and a linear gradient from 100:0 to 10:90 within the following 2 min. To illustrate our approach of linking metabolites produced by *A. novofumigatus* to their respective gene clusters, we chose to target our metabolite analysis towards the model compounds novofumigatonin, *ent*-cycloechinulin, *epi*-aszonalenin A and C, since they represent major metabolites produced by this species and because we have them as pure standards in our in-house collection of fungal metabolites [43]. For a full list of metabolites known from *A. novofumigatus* please consult Frisvad & Larsen [44].

## References

1. Christensen M. The *Aspergillus ochraceus* Group: Two New Species from Western Soils and a Synoptic Key. *Mycologia*. 1982;74:210–25.  
[http://www.jstor.org.proxy.findit.dtu.dk/stable/3792887?origin=crossref&seq=1#page\\_scan\\_tab\\_contents](http://www.jstor.org.proxy.findit.dtu.dk/stable/3792887?origin=crossref&seq=1#page_scan_tab_contents). Accessed 20 Oct 2015.
2. Rahbæk L, Frisvad JC, Christophersen C. An amendment of *Aspergillus* section *Candidi* based on chemotaxonomical evidence. *Phytochemistry*. 2000;53:581–6. doi:10.1016/S0031-9422(99)00596-8.
3. Varga J, Frisvad JC, Samson RA. Polyphasic taxonomy of *Aspergillus* section *Candidi* based on molecular, morphological and physiological data. *Stud Mycol*. 2007;59:75–88.

doi:10.3114/sim.2007.59.10.

4. Hong S-B, Go S-J, Shin H-D, Frisvad JC, Samson RA. Polyphasic Taxonomy of *Aspergillus fumigatus* and Related Species. *Mycologia*. 2005;97:1316–29.

[http://www.jstor.org.proxy.findit.dtu.dk/stable/3762370?seq=1#page\\_scan\\_tab\\_contents](http://www.jstor.org.proxy.findit.dtu.dk/stable/3762370?seq=1#page_scan_tab_contents).

Accessed 20 Oct 2015.

5. Peláez T, Álvarez-Pérez S, Mellado E, Serrano D, Valerio M, Blanco JL, et al. Invasive aspergillosis caused by cryptic *Aspergillus* species: A report of two consecutive episodes in a patient with leukaemia. *J Med Microbiol*. 2013;62 PART3:474–8.

6. Bartoli A, Maggi O. Four new species of *Aspergillus* from Ivory Coast soil. *Trans Br Mycol Soc*. 1978;71:383–94. doi:10.1016/S0007-1536(78)80064-3.

7. Klich M a, Cary JW, Beltz SB, Bennett C a. Phylogenetic and morphological analysis of *Aspergillus ochraceoroseus*. *Mycologia*. 2003;95:1252–60.

8. Cary JW, Harris-Coward PY, Ehrlich KC, Moore GG, Wei Q, Bhatnagar D. Functional and phylogenetic analysis of the *Aspergillus ochraceoroseus* aflQ (ordA) gene ortholog. *Mycologia*. 2012;104:857–64.

9. Samson RA, Visagie CM, Houbraeken J, Hong S-B, Hubka V, Klaassen CHW, et al.

Phylogeny, identification and nomenclature of the genus *Aspergillus*. *Stud Mycol*. 2014;78:141–73.

doi:10.1016/j.simyco.2014.09.001.

10. Visagie CM, Houbraeken J, Frisvad JC, Hong S, Klaassen CHW, Perrone G, et al. Ochratoxin production and taxonomy of the yellow aspergilli (*Aspergillus* section *Circumdati*). *Stud Mycol*.

2014;78:1–61. doi:10.1016/j.simyco.2014.09.001.

11. Frisvad JC, Frank J., Houbraeken JAMP, Kuijpers AFA, Samson RA, Frisvad JC. New ochratoxin A

producing species of *Aspergillus* section *Circumdati*. *Stud Mycol.* 2004;50:23–43.

12. Arnaud MB, Cerqueira GC, Inglis DO, Skrzypek MS, Binkley J, Chibucos MC, et al. The *Aspergillus* Genome Database (AspGD): Recent developments in comprehensive multispecies curation, comparative genomics and community resources. *Nucleic Acids Res.* 2012;40:653–9.

13. Machida M, Asai K, Sano M, Tanaka T, Kumagai T, Terai G, et al. Genome sequencing and analysis of *Aspergillus oryzae*. *Nature.* 2005;438:1157–61. doi:10.1038/nature04300.

14. Galagan JE, Calvo SE, Cuomo C, Ma L-J, Wortman JR, Batzoglou S, et al. Sequencing of *Aspergillus nidulans* and comparative analysis with *A. fumigatus* and *A. oryzae*. *Nature.* 2005;438:1105–15. doi:10.1038/nature04341.

15. Andersen MR, Salazar MP, Schaap PJ, Van De Vondervoort PJI, Culley D, Thykaer J, et al. Comparative genomics of citric-acid-producing *Aspergillus niger* ATCC 1015 versus enzyme-producing CBS 513.88. *Genome Res.* 2011;21:885–97.

16. Nierman WC, Pain A, Anderson MJ, Wortman JR, Kim HS, Arroyo J, et al. Genomic sequence of the pathogenic and allergenic filamentous fungus *Aspergillus fumigatus*. *Nature.* 2005;438:1151–6. doi:10.1038/nature04332.

17. Fedorova ND, Khaldi N, Joardar VS, Maiti R, Amedeo P, Anderson MJ, et al. Genomic islands in the pathogenic filamentous fungus *Aspergillus fumigatus*. *PLoS Genet.* 2008;4:e1000046. doi:10.1371/journal.pgen.1000046.

18. Ronning CM, Fedorova ND, Bowyer P, Coulson R, Goldman G, Kim HS, et al. Genomics of *Aspergillus fumigatus*. *Rev Iberoam Micol.* 2005;22:223–8.  
<http://www.ncbi.nlm.nih.gov/pubmed/16499415>. Accessed 10 Dec 2015.

19. Joardar V, Abrams NF, Hostetler J, Paukstelis PJ, Pakala S, Pakala SB, et al. Sequencing of

- mitochondrial genomes of nine *Aspergillus* and *Penicillium* species identifies mobile introns and accessory genes as main sources of genome size variability. *BMC Genomics*. 2012;13:698. doi:10.1186/1471-2164-13-698.
20. Lonial S, Williams L, Carrum G, Ostrowski M, McCarthy P. *Neosartorya fischeri*: an invasive fungal pathogen in an allogeneic bone marrow transplant patient. *Bone Marrow Transplant*. 1997;19:753–5. doi:10.1038/sj.bmt.1700715.
21. Galagan JE, Calvo SE, Borkovich KA, Selker EU, Read ND, Jaffe D, et al. The genome sequence of the filamentous fungus *Neurospora crassa*. *Nature*. 2003;422:859–68. doi:10.1038/nature01554.
22. Samson RA, Houbraken J, Thrane U, Frisvad JC, Andersen B. *Food and Indoor Fungi*. CBS-KNAW Fungal Biodiversity Centre; 2010. <http://findit.dtu.dk/en/catalog/2185758085>. Accessed 14 Aug 2017.
23. Fulton TM, Chunwongse J, Tanksley SD. Microprep protocol for extraction of DNA from tomato and other herbaceous plants. *Plant Mol Biol Report*. 1995;13:207–9.
24. Chin C-S, Alexander DH, Marks P, Klammer AA, Drake J, Heiner C, et al. Nonhybrid, finished microbial genome assemblies from long-read SMRT sequencing data. *Nat Methods*. 2013;10:563–9. doi:10.1038/nmeth.2474.
25. Zerbino DR, Birney E. Velvet: Algorithms for de novo short read assembly using de Bruijn graphs. *Genome Res*. 2008;18:821–9. doi:10.1101/gr.074492.107.
26. Gnerre S, Maccallum I, Przybylski D, Ribeiro FJ, Burton JN, Walker BJ, et al. High-quality draft assemblies of mammalian genomes from massively parallel sequence data. *Proc Natl Acad Sci U S A*. 2011;108:1513–8. doi:10.1073/pnas.1017351108.
27. Martin J, Bruno VM, Fang Z, Meng X, Blow M, Zhang T, et al. Rnnotator : an automated de

novo transcriptome assembly pipeline from stranded RNA-Seq reads Duplicate read removal  
Multiple Velvet assemblies. 2010.

28. Grigoriev I V., Martinez DA, Salamov AA. Fungal genomic annotation. *Appl Mycol Biotechnol.* 2006;6 C:123–42.

29. Grigoriev I V., Nikitin R, Haridas S, Kuo A, Ohm R, Otilar R, et al. MycoCosm portal: Gearing up for 1000 fungal genomes. *Nucleic Acids Res.* 2014;42:699–704.

30. Khaldi N, Seifuddin FT, Turner G, Haft D, Nierman WC, Wolfe KH, et al. SMURF: Genomic mapping of fungal secondary metabolite clusters. *Fungal Genet Biol.* 2010;47:736–41.  
doi:10.1016/j.fgb.2010.06.003.

31. Jones P, Binns D, Chang H-Y, Fraser M, Li W, McAnulla C, et al. InterProScan 5: genome-scale protein function classification. *Bioinformatics.* 2014;30:1236–40.  
doi:10.1093/bioinformatics/btu031.

32. Altschul SF, Gish W, Miller W, Myers EW, Lipman DJ. Basic local alignment search tool. *J Mol Biol.* 1990;215:403–10. doi:10.1016/S0022-2836(05)80360-2.

33. Camacho C, Coulouris G, Avagyan V, Ma N, Papadopoulos J, Bealer K, et al. BLAST+: architecture and applications. *BMC Bioinformatics.* 2009;10:421. doi:10.1186/1471-2105-10-421.

34. Qi J, Wang B, Hao BI. Whole Proteome Prokaryote Phylogeny Without Sequence Alignment: A K-String Composition Approach. *J Mol Evol.* 2004;58:1–11.

35. Zuo G, Li Q, Hao B. On K-peptide length in composition vector phylogeny of prokaryotes. *Comput Biol Chem.* 2014;53:166–73. doi:10.1016/j.compbiolchem.2014.08.021.

36. Hunter S, Apweiler R, Attwood TK, Bairoch A, Bateman A, Binns D, et al. InterPro: The integrative protein signature database. *Nucleic Acids Res.* 2009;37 SUPPL. 1:211–5.

37. Mitchell A, Chang H-Y, Daugherty L, Fraser M, Hunter S, Lopez R, et al. The InterPro protein families database: the classification resource after 15 years. *Nucleic Acids Res.* 2014;43:D213-221. doi:10.1093/nar/gku1243.
38. Flusberg BA, Webster DR, Lee JH, Travers KJ, Olivares EC, Clark TA, et al. Direct detection of DNA methylation during single-molecule, real-time sequencing. *Nat Methods.* 2010;7:461–5. doi:10.1038/nmeth.1459.
39. Sullivan MJ, Petty NK, Beatson SA. Easyfig: a genome comparison visualizer. *Bioinformatics.* 2011;27:1009–10. doi:10.1093/bioinformatics/btr039.
40. Kurtz S, Phillippy A, Delcher AL, Smoot M, Shumway M, Antonescu C, et al. Versatile and open software for comparing large genomes. *Genome Biol.* 2004;5:R12.
41. Delcher AL, Phillippy A, Carlton J, Salzberg SL. Fast algorithms for large-scale genome alignment and comparison. *Nucleic Acids Res.* 2002;30:2478–83. doi:10.1093/nar/30.11.2478.
42. Delcher AL, Kasif S, Fleischmann RD, Peterson J, White O, Salzberg SL. Alignment of whole genomes. *Nucleic Acids Res.* 1999;27. <http://mummer.sourceforge.net/MUMmer.pdf>. Accessed 24 Nov 2017.
43. Nielsen KF, Månsson M, Rank C, Frisvad JC, Larsen TO. Dereplication of Microbial Natural Products by LC-DAD-TOFMS. *J Nat Prod.* 2011;74:2338–48. doi:10.1021/np200254t.
44. Frisvad JC, Larsen TO. Extrolites of *Aspergillus fumigatus* and Other Pathogenic Species in *Aspergillus* Section *Fumigati*. *Front Microbiol.* 2016;6 January:1–14.

## **Part 2: Protocol for preparation of Fungal DNA**

The protocol described below has successfully been employed to isolate genome-sequencing grade genomic DNA for more than 200 different *Aspergillus* species.

### List of Materials:

|                                            |                                          |
|--------------------------------------------|------------------------------------------|
| D-Sorbitol                                 | (Sigma, S1876 – CAS 50-70-4)             |
| Tris-Base                                  | (Sigma 7-9, T1378 – CAS 7786-1)          |
| 37% HCl                                    | (Th. Geyer, 836,1000)                    |
| EDTA                                       | (Merck, 324503 – CAS 6381-92-6)          |
| Sodium Chloride (NaCl)                     | (AppliChem A1371,9010 – CAS 7647-14-5]   |
| Cetyl trimethylammonium bromide (CTAB)     | (Sigma 52365 – CAS 57-09-0)              |
| Sarkosyl NL                                | (Sigma, L5777 – CAS 137-16-6)            |
| Polyvinylpyrrolidone (PVP)                 | (Sigma PVP-40T – CAS 9003-39-8)          |
| Proteinase K                               | (NEB P8107S)                             |
| Potassium acetate                          | (J. T. Baker 0129910025 – CAS 127-08-2)  |
| Phenol:Chloroform:Isoamylalcohol (25:24:1) | (Sigma P3803)                            |
| Sodium acetate                             | (J. T. Baker 9914011001 – CAS 6131-90-4] |
| 96 % Ethanol                               | (vwr chemicals)                          |
| 70 % Ethanol                               | (vwr chemicals)                          |
| Isopropanol                                | (Merck, 109634 – CAS 67-63-0)            |
| Liquid nitrogen                            |                                          |
| Sodium Hydroxide                           | (Sigma S5881 – CAS 1310-73-2)            |
| RNase A                                    | (Sigma R-4875 – CAS 9001-99-4)           |

### Preparation of liquid Media

#### Buffers:

- 5M Potassium acetate (pH 7.5): 122.5 g potassium acetate and ddH<sub>2</sub>O up to 250 mL. pH adjusted with acetic acid.
- 3M Sodium acetate: 81.65 g sodium acetate and ddH<sub>2</sub>O up to 200 mL.
- 1% PVP: 2 g PVP in 200 mL ddH<sub>2</sub>O
- 5% Sarkosyl: 10 g Sarkosyl in 200 mL ddH<sub>2</sub>O.
- 1M Tris-HCl (pH 9): 60.57 g Tris-base and 4.81 ml 37% HCl. Add ddH<sub>2</sub>O up to 500 mL.
- 0.5M EDTA: 116.4 g EDTA. Add ddH<sub>2</sub>O up to 500 mL. Add Sodium Hydroxide pellet until pH reach 8.0.
- Buffer A: 31.9 g Sorbitol, 50 mL 1M Tris-HCl (pH 9), 5 mL 0.5M EDTA (pH 8) and ddH<sub>2</sub>O up to 500 mL.
- Buffer B: 100 mL 1M Tris-HCl (pH 9), 50 mL 0.5M EDTA, 58.44 g NaCl, 10 g CTAB. Add ddH<sub>2</sub>O up to 500 mL.
- TE (pH 9): 1.21 g Tris-base, 0.37 g EDTA. Add ddH<sub>2</sub>O up to 1000 mL.

All solutions above are to be autoclaved!



- Lysis Buffer: For 10 ml pr. sample use: 3.75 ml Buffer A; 3.75 ml Buffer B; 1.5 ml 5 % Sarkosyl; 1 ml 1 % PVP; 100 µl Proteinase K
- RNase A: Dissolve 10 mg dry powder in 1 ml ddH<sub>2</sub>O

### **Equipment:**

- Nanodrop: NanoDrop ND 1000 Spectrophotometer or NanoDrop Lite from Qiagen.
- Qubit: Qubit 1.0 fluorometer from Invitrogen and Qubit dsDNA BR Assay Kit (Q32853) from ThermoFisher.
- Mortar and pestle.
- Centrifuge for 50ml Falcon tubes at 4°C.

### **Protocol:**

1. Pre-heat Buffer B at 65°C
2. Prepare Lysis Buffer just before use and keep at 65°C.
3. Transfer freeze-dried mycelia into a mortar and cover with liquid nitrogen. Grind material and transfer to a 50 ml Falcon tube as soon as all liquid nitrogen has evaporated. Powder in the tube should not exceed the 5ml mark, but a minimum of 3 ml is recommended. Note powder must not thaw.
4. Add 10 ml Lysis Buffer and mix vigorously by vortexing.
5. Incubate for 30 min at 65°C. Mix frequently by inverting the tube.
6. Add 3.35 ml 5 M Potassium acetate. Mix gently by inverting the tube 5-7 times. Incubate solution 30 min on ice.
7. Centrifuge for 30 min at 5,000 g at 4°C.
8. Transfer the supernatant, approximately 9mL, to a new 50 ml Falcon tube and add 5ml of Phenol:Chloroform:Isoamylalcohol (25:24:1). Mix gently 5-7 times.
9. Centrifuge 20 min at 4,000 g at 4 °C.
10. Transfer the aqueous phase (~8mL) to a new 50 ml Falcon tube. Note avoid any material from the interphase.
11. Add 100 µl RNase A (10 mg/ml) and mix gently. Incubate at room temperature for 30-60 min.
12. Add 1/10 volume of 3M Sodium acetate and 1 volume ice-cold 96% Ethanol (Alternatively, Isopropanol can be used, but it may adversely influence A260/A280 measurements). Incubate solution at 20°C for 30 min.
13. Centrifuge for 30 min at 10,000 g and 4°C
14. Discard the supernatant.
15. Wash the pellet with 2 ml 70 % ethanol and pipette as much away without disturbing the pellet.

16. Dry the pellet at room temperature until all ethanol has evaporated (approximately 15 minutes).

Note: do not let the pellet dry out!

17. Dissolve the pellet in 500  $\mu$ L TE. This may take over-night incubation at room temperature with light shaking. Transfer DNA solution to a 2 ml Eppendorf tube.

18. Take a sample for DNA quality assessments (see below) and store the remaining DNA solution at -20 °C until further use.

19. For testing DNA quality:

Make a 20-fold dilution of the DNA solution (from step 18) in a 1.5 ml Eppendorf tube to a total volume of 100  $\mu$ L.

A. Run a 5-10  $\mu$ L diluted sample on an agarose gel to estimate the quality and concentration.

B. Use the nanodrop for  $A_{260}/A_{280}$  measurements. Ratios should be in the range of 1.6-2.2.

C. Use the Qubit to determine DNA concentration estimations. Good predations fall in the range of 20-200 ng/ $\mu$ L DNA in stock solution.

Table S1 Overview of the most common InterPro domains for the unique genes in the investigated species and the number of times the InterPro domain is found in a unique gene in the investigated species.

| Species            | Total predicted proteins | Total unique proteins | Unique genes % | InterPro annotated unique | Most common IPR, # of IPR in unique genes |           |           |           |           |           |           |
|--------------------|--------------------------|-----------------------|----------------|---------------------------|-------------------------------------------|-----------|-----------|-----------|-----------|-----------|-----------|
|                    |                          |                       |                |                           | IPR001138                                 | IPR016040 | IPR002110 | IPR016196 | IPR011009 | IPR007219 | IPR001128 |
| A. campestris      | 9764                     | 2162                  | 22%            | 670 (31%)                 | 43                                        | 34        | 35        | 21        | 19        | 10        | 28        |
| A. clavatus        | 9121                     | 1053                  | 12%            | 349 (33%)                 | 20                                        | 23        | 18        | 20        | 6         | 7         | 21        |
| A. flavus          | 12604                    | 1953                  | 15%            | 659 (34%)                 | 52                                        | 46        | 32        | 48        | 25        | 37        | 22        |
| A. fumigatus Af293 | 9781                     | 188                   | 2%             | 67 (36%)                  | 0                                         | 2         | 5         | 3         | 1         | 0         | 1         |
| A. fumigatus A1163 | 9916                     | 343                   | 3%             | 100 (29%)                 | 8                                         | 1         | 8         | 5         | 7         | 3         | 3         |
| A. niger ATCC 1015 | 11910                    | 3168                  | 27%            | 1232 (39%)                | 135                                       | 94        | 63        | 71        | 37        | 75        | 47        |
| A. nidulans        | 10680                    | 2391                  | 22%            | 943 (39%)                 | 103                                       | 63        | 37        | 46        | 17        | 47        | 36        |
| A. novofumigatus   | 11549                    | 1695                  | 15%            | 462 (27%)                 | 26                                        | 37        | 30        | 20        | 14        | 13        | 36        |
| A. ochraceoroseus  | 8924                     | 1881                  | 21%            | 519 (28%)                 | 57                                        | 26        | 6         | 12        | 27        | 20        | 18        |
| A. oryzae          | 12031                    | 1842                  | 15%            | 635 (34%)                 | 36                                        | 26        | 46        | 32        | 22        | 28        | 16        |
| A. steynii         | 13211                    | 3520                  | 27%            | 1270 (36%)                | 163                                       | 114       | 67        | 54        | 27        | 72        | 43        |
| A. terreus         | 10406                    | 2117                  | 20%            | 905 (43%)                 | 55                                        | 66        | 54        | 45        | 37        | 52        | 37        |
| A. fischerianus    | 10406                    | 704                   | 7%             | 249 (35%)                 | 6                                         | 21        | 23        | 14        | 11        | 6         | 9         |
| N. Crassa          | 10785                    | 7063                  | 65%            | 3471 (49%)                | 147                                       | 91        | 53        | 66        | 81        | 68        | 28        |
| P. Chrysogenum     |                          | 3215                  |                | 1101 (34%)                | 126                                       | 64        | 44        | 35        | 57        | 52        | 30        |

| IPR ID    | Description                                           |
|-----------|-------------------------------------------------------|
| IPR001138 | Fungal transcriptional regulatory protein, N-terminal |
| IPR016040 | NAD(P)-binding                                        |
| IPR002110 | Ankyrin                                               |
| IPR016196 | MFS general substrate transporter                     |
| IPR011009 | Protein kinase-like                                   |
| IPR007219 | Fungal specific transcription factor                  |
| IPR001128 | Cytochrome P450                                       |

|        |                             |
|--------|-----------------------------|
| Top    | IPR with most counts        |
| Second | IPR with second most counts |
| Third  | IPR with third most counts  |

Table S2 Allergens from *A. novofumigatus*. A list of allergens from *A. fumigatus* (from [www.allergome.org](http://www.allergome.org)) and the orthologs in *A. novofumigatus* including the percent identity of the BLAST comparison.

| Allergen name     | <i>A. fumigatus</i> AF293 accession | <i>A. novofumigatus</i> orthologue                           | % ID  |
|-------------------|-------------------------------------|--------------------------------------------------------------|-------|
| Asp_f1            | AFUA_5G02330                        | jgi-Aspnov1-365359-e_gw1.2.4275.1                            | 98.86 |
| Asp_f2            | AFUA_4G09580                        | jgi-Aspnov1-432190-fgenes1_pg.5_#_493                        | 93.56 |
| Asp_f3            | AFUA_6G02280                        | jgi-Aspnov1-388041-estExt_Genewise1Plus.C_3_t50474           | 97.62 |
| Asp_f4            | AFUA_2G03830                        | jgi-Aspnov1-432819-fgenes1_pg.6_#_39                         | 94    |
| Asp_f5            | AFUA_8G07080                        | jgi-Aspnov1-395206-estExt_Genewise1Plus.C_7_t30340           | 95.58 |
| Asp_f6            | AFUA_1G14550                        | jgi-Aspnov1-512129-estExt_fgenes1_pm.C_4_t10311              | 99.47 |
| Asp_f7            | AFUA_4G06670                        | jgi-Aspnov1-443000-fgenes1_kg.5_#_844_#_Locus964v1rpkm138.38 | 92.6  |
| Asp_f8            | AFUA_2G10100                        | jgi-Aspnov1-30553-CE30552_16949                              | 90    |
| Asp_f9            | AFUA_1G16190                        | jgi-Aspnov1-430704-fgenes1_pg.4_#_185                        | 94.07 |
| Asp_f10           | AFUA_5G13300                        | jgi-Aspnov1-363785-e_gw1.2.2138.1                            | 95.19 |
| Asp_f11           | AFUA_2G03720                        | jgi-Aspnov1-426603-fgenes1_pg.1_#_378                        | 93.57 |
| Asp_f12           | AFUA_5G04170                        | jgi-Aspnov1-509883-estExt_fgenes1_pm.C_2_t10392              | 99.27 |
| Asp_f13           | AFUA_4G11800                        | jgi-Aspnov1-431992-fgenes1_pg.5_#_295                        | 94.29 |
| Asp_f15           | AFUA_2G12630                        | jgi-Aspnov1-430704-fgenes1_pg.4_#_185                        | 94.07 |
| Asp_f17           | AFUA_4G03240                        | jgi-Aspnov1-409635-estExt_Genewise1.C_5_t50054               | 91.33 |
| Asp_f18           | AFUA_4G11800                        | jgi-Aspnov1-431992-fgenes1_pg.5_#_295                        | 94.3  |
| Asp_f22           | AFUA_6G06770                        | jgi-Aspnov1-367285-e_gw1.3.3588.1                            | 99.09 |
| Asp_f23           | AFUA_2G11850                        | jgi-Aspnov1-447552-estExt_Genemark1.C_1_t30040               | 94.23 |
| Asp_f26           | AFUA_1G06830                        | jgi-Aspnov1-370658-e_gw1.4.1124.1                            | 86.49 |
| Asp_f27           | AFUA_3G07430                        | jgi-Aspnov1-453038-estExt_Genemark1.C_6_t10423               | 90.8  |
| Asp_f28           | AFUA_6G10300                        | jgi-Aspnov1-367561-e_gw1.3.3658.1                            | 96.1  |
| Asp_f29           | AFUA_5G11320                        | jgi-Aspnov1-445073-fgenes1_kg.8_#_93_#_Locus606v1rpkm225.43  | 74.26 |
| Asp_AfCalAp       | AFUA_3G09690                        | jgi-Aspnov1-515921-estExt_fgenes1_pm.C_100047                | 94.79 |
| Asp_f_chitinase   | AFUA_4G01290                        | jgi-Aspnov1-412759-estExt_Genewise1.C_8_t10196               | 94.21 |
| Asp_f_AT          | AFUA_1G09470                        | jgi-Aspnov1-512574-estExt_fgenes1_pm.C_4_t20289              | 91.19 |
| Asp_f_catalase    | AFUA_3G02270                        | jgi-Aspnov1-440530-fgenes1_kg.3_#_979_#_Locus6690v1rpkm8.88  | 50.21 |
| Asp_f_DPPV        | AFUA_2G09030                        | jgi-Aspnov1-453870-estExt_Genemark1.C_7_t10446               | 88.57 |
| Asp_f_glucosidase | AFUA_1G05770                        | jgi-Aspnov1-431600-fgenes1_pg.4_#_1081                       | 93.36 |
| Asp_f_GST         | AFUA_6G09690                        | jgi-Aspnov1-458931-fgenes1_pm.3_#_489                        | 96.67 |
| Asp_f_GT          | AFUA_6G11390                        | jgi-Aspnov1-398517-estExt_Genewise1.C_1_t10227               | 88.44 |
| Asp_f_IAO         | AFUA_6G03620                        | jgi-Aspnov1-413975-estExt_Genewise1.C_9_t20169               | 51.01 |
| Asp_f_IPMI        | AFUA_2G11260                        | jgi-Aspnov1-500519-estExt_fgenes1_pg.C_1_t20448              | 96.27 |
| Asp_f_LPL1        | AFUA_4G08720                        | jgi-Aspnov1-516331-estExt_fgenes1_pm.C_120063                | 94.96 |
| Asp_f_LPL3        | AFUA_3G14680                        | jgi-Aspnov1-516331-estExt_fgenes1_pm.C_120063                | 90.83 |
| Asp_f_mannosidase | AFUA_1G14560                        | jgi-Aspnov1-460012-fgenes1_pm.4_#_314                        | 94.65 |
| Asp_f_MDH         | AFUA_7G05740                        | jgi-Aspnov1-462836-fgenes1_pm.7_#_121                        | 96.19 |
| Asp_f_PL          | AFUA_2G00760                        | jgi-Aspnov1-499715-estExt_fgenes1_pg.C_1_t10092              | 92.83 |
| Asp_f_PUP         | AFUA_5G03520                        | jgi-Aspnov1-438430-fgenes1_kg.2_#_311_#_Locus9805v1rpkm2.72  | 95.05 |
| Asp_f_SXR         | AFUA_2G15430                        | jgi-Aspnov1-47013-CE47012_27880                              | 99.57 |
| Asp_f_CP          | AFUA_8G01670                        | jgi-Aspnov1-445108-fgenes1_kg.8_#_128_#_Locus912v1rpkm147.61 | 96.31 |
| Asp_f_FDH         | AFUA_6G04920                        | jgi-Aspnov1-440417-fgenes1_kg.3_#_866_#_Locus1540v1rpkm84.43 | 95.16 |



Table S3 Virulence factors from *A. fumigatus*. A collection of virulence factors known from *A. fumigatus* and the best orthologs in *A. novofumigatus* along with the percent identity of the BLAST comparison.

| <i>A. fumigatus</i><br>AF293<br>accession | Common<br>name           | Gene function                                                                                                            | <i>A. novofumigatus</i> orthologue                                    | % ID  |
|-------------------------------------------|--------------------------|--------------------------------------------------------------------------------------------------------------------------|-----------------------------------------------------------------------|-------|
| AFUA_1G01550                              | zrfA                     | High affinity zinc ion transporter, putative<br>[Source:UniProtKB/TrEMBL;Acc:Q4WKR5]                                     | jgi-Aspnov1-378097-e_gw1.9.842.1                                      | 91.92 |
| AFUA_1G05800                              | mkk2                     | MAP kinase kinase (Mkk2), putative<br>[Source:UniProtKB/TrEMBL;Acc:Q4WJJ0]                                               | jgi-Aspnov1-451544-<br>estExt_Genemark1.C_4_t30113                    | 90.68 |
| AFUA_1G09280                              | ptcB                     | Protein phosphatase 2C, putative<br>[Source:UniProtKB/TrEMBL;Acc:Q4WTH5]                                                 | jgi-Aspnov1-460512-<br>fgenes1_pm.4_#_814                             | 91.44 |
| AFUA_1G10880                              | pmcA                     | P-type calcium ATPase, putative<br>[Source:UniProtKB/TrEMBL;Acc:Q4WT17]                                                  | jgi-Aspnov1-420834-gm1.5181_g                                         | 92.44 |
| AFUA_1G14660                              | laeA                     | Regulator of secondary metabolism LaeA<br>[Source:UniProtKB/TrEMBL;Acc:Q4WRY5]                                           | jgi-Aspnov1-370504-e_gw1.4.2095.1                                     | 98.66 |
| AFUA_1G15440                              | ags3                     | Alpha-1,3-glucan synthase Ags3<br>[Source:UniProtKB/TrEMBL;Acc:Q4WRQ8]                                                   | jgi-Aspnov1-447502-<br>estExt_Genemark1.C_1_t20487                    | 54.83 |
| AFUA_1G16950                              | pig-a                    | Phosphatidylinositol:UDP-GlcNAc transferase subunit<br>PIG-A [Source:UniProtKB/TrEMBL;Acc:Q4WRA7]                        | jgi-Aspnov1-405712-<br>estExt_Genewise1.C_4_t10229                    | 97.96 |
| AFUA_2G01260                              | srbA                     | HLH transcription factor, putative<br>[Source:UniProtKB/TrEMBL;Acc:Q4WIN1]                                               | jgi-Aspnov1-455802-<br>fgenes1_pm.1_#_129                             | 95.14 |
| AFUA_2G07680                              | sidA                     | L-ornithine N5-oxygenase SidA<br>[Source:UniProtKB/TrEMBL;Acc:E9QYP0]                                                    | jgi-Aspnov1-447204-<br>estExt_Genemark1.C_1_t20174                    | 96.01 |
| AFUA_2G07770                              | rasB                     | Ras small monomeric GTPase RasB<br>[Source:UniProtKB/TrEMBL;Acc:Q4X241]                                                  | jgi-Aspnov1-363087-e_gw1.1.2643.1                                     | 99.16 |
| AFUA_2G08360                              | pyrG                     | Orotidine 5'-phosphate decarboxylase<br>[Source:UniProtKB/Swiss-Prot;Acc:O13410]                                         | jgi-Aspnov1-399623-<br>estExt_Genewise1.C_1_t30405                    | 97.81 |
| AFUA_2G11270                              | ags2                     | Alpha-1,3-glucan synthase Ags2<br>[Source:UniProtKB/TrEMBL;Acc:Q4X143]                                                   | jgi-Aspnov1-447502-<br>estExt_Genemark1.C_1_t20487                    | 96.78 |
| AFUA_2G12200                              | pkaC1                    | cAMP-dependent protein kinase catalytic subunit PkaC1<br>[Source:UniProtKB/TrEMBL;Acc:Q4X0V1]                            | jgi-Aspnov1-363483-e_gw1.1.1181.1                                     | 90.24 |
| AFUA_2G12640                              | gprD                     | Integral membrane protein<br>[Source:UniProtKB/TrEMBL;Acc:Q4X0Q7]                                                        | jgi-Aspnov1-456628-<br>fgenes1_pm.1_#_955                             | 90.43 |
| AFUA_2G17530                              | Melanin<br>cluster, arb2 | Conidial pigment biosynthesis oxidase Arb2<br>[Source:UniProtKB/TrEMBL;Acc:E9RBR0]                                       | jgi-Aspnov1-501077-<br>estExt_fgenes1_pg.C_1_t40073                   | 92.15 |
| AFUA_2G17540                              | Melanin<br>cluster, abr1 | Conidial pigment biosynthesis oxidase Abr1/brown 1<br>[Source:UniProtKB/TrEMBL;Acc:Q4WZB4]                               | jgi-Aspnov1-417292-gm1.1639_g                                         | 88.61 |
| AFUA_2G17550                              | Melanin<br>cluster, ayg1 | Conidial pigment biosynthesis protein Ayg1<br>[Source:UniProtKB/TrEMBL;Acc:Q4WZB3]                                       | jgi-Aspnov1-438093-<br>fgenes1_kg.1_#_1767_#_Locus2445v<br>1rpkm48.63 | 94.2  |
| AFUA_2G17560                              | Melanin<br>cluster, arp2 | Conidial pigment biosynthesis 1,3,6,8-<br>tetrahydroxynaphthalene reductase Arp2<br>[Source:UniProtKB/TrEMBL;Acc:E9QUT3] | jgi-Aspnov1-460884-<br>fgenes1_pm.5_#_30                              | 49.22 |
| AFUA_2G17580                              | Melanin<br>cluster, arp1 | Probable scytalone dehydratase<br>[Source:UniProtKB/Swiss-Prot;Acc:O14434]                                               | jgi-Aspnov1-457049-<br>fgenes1_pm.1_#_1376                            | 95.15 |
| AFUA_2G17600                              | Melanin<br>cluster, alb1 | Conidial pigment polyketide synthase PksP/Alb1<br>[Source:UniProtKB/TrEMBL;Acc:Q4WZA8]                                   | jgi-Aspnov1-448094-<br>estExt_Genemark1.C_1_t40143                    | 94.78 |
| AFUA_3G05650                              | orlA                     | Alpha,alpha-trehalose-phosphate synthase subunit<br>Tps2, putative<br>[Source:UniProtKB/TrEMBL;Acc:Q4WWF5]               | jgi-Aspnov1-514040-<br>estExt_fgenes1_pm.C_6_t10212                   | 97.88 |
| AFUA_3G09820                              | dvrA                     | C2H2 transcription factor, putative<br>[Source:UniProtKB/TrEMBL;Acc:Q4WXX4]                                              | jgi-Aspnov1-462495-<br>fgenes1_pm.6_#_581                             | 93.38 |
| AFUA_3G11250                              | ace2                     | C2H2 transcription factor (Swi5), putative<br>[Source:UniProtKB/TrEMBL;Acc:Q4WXZ7]                                       | jgi-Aspnov1-423283-gm1.7630_g                                         | 87.45 |
| AFUA_3G11970                              | pacC                     | pH-response transcription factor pacC/RIM101<br>[Source:UniProtKB/Swiss-Prot;Acc:Q4WY67]                                 | jgi-Aspnov1-514555-<br>estExt_fgenes1_pm.C_6_t20262                   | 89.44 |

|              |                       |                                                                                                    |                                                                |       |
|--------------|-----------------------|----------------------------------------------------------------------------------------------------|----------------------------------------------------------------|-------|
| AFUA_3G12690 | glfA                  | Putative uncharacterized protein [Source:UniProtKB/TrEMBL;Acc:Q4WYD9]                              | jgi-Aspnov1-446369-fgenes1_kg.13_#_42_#_Locus6047v1 rpk11.26   | 74.92 |
| AFUA_4G06820 | ecm33                 | Protein ecm33 [Source:UniProtKB/Swiss-Prot;Acc:Q4WNS8]                                             | jgi-Aspnov1-442983-fgenes1_kg.5_#_827_#_Locus141v1r pkm963.23  | 87    |
| AFUA_4G11800 | Alp1                  | Alkaline protease 1 [Source:UniProtKB/Swiss-Prot;Acc:P28296]                                       | jgi-Aspnov1-431992-fgenes1_pg.5_#_295                          | 94.29 |
| AFUA_4G12470 | cpcA                  | BZIP transcription factor CpcA [Source:UniProtKB/TrEMBL;Acc:E9QUZ5]                                | jgi-Aspnov1-461084-fgenes1_pm.5_#_230                          | 90.87 |
| Afua_4g14770 | Helvolic acid cluster | Protostadienol synthase A [Source:UniProtKB/Swiss-Prot;Acc:Q4WR16]                                 | jgi-Aspnov1-501426-estExt_fgenes1_pg.C_2_t10392                | 42.86 |
| Afua_4g14780 | Helvolic acid cluster | Cytochrome P450 monooxygenase, putative [Source:UniProtKB/TrEMBL;Acc:Q4WR17]                       | jgi-Aspnov1-458437-fgenes1_pm.2_#_1359                         | 47.7  |
| Afua_4g14790 | Helvolic acid cluster | Cytochrome P450 monooxygenase, putative [Source:UniProtKB/TrEMBL;Acc:Q4WR18]                       | jgi-Aspnov1-458437-fgenes1_pm.2_#_1359                         | 92.5  |
| Afua_4g14800 | Helvolic acid cluster | Short chain dehydrogenase, putative [Source:UniProtKB/TrEMBL;Acc:Q4WR19]                           | jgi-Aspnov1-439546-fgenes1_kg.2_#_1427_#_Locus1689v 1rpk176.29 | 94    |
| Afua_4g14810 | Helvolic acid cluster | Cytochrome P450 monooxygenase, putative [Source:UniProtKB/TrEMBL;Acc:Q4WR20]                       | jgi-Aspnov1-458435-fgenes1_pm.2_#_1357                         | 85.6  |
| Afua_4g14820 | Helvolic acid cluster | Transferase family protein [Source:UniProtKB/TrEMBL;Acc:Q4WR21]                                    | jgi-Aspnov1-439545-fgenes1_kg.2_#_1426_#_Locus3005v 1rpk138.16 | 91    |
| Afua_4g14830 | Helvolic acid cluster | Cytochrome P450 monooxygenase, putative [Source:UniProtKB/TrEMBL;Acc:Q4WR22]                       | jgi-Aspnov1-458437-fgenes1_pm.2_#_1359                         | 47.59 |
| Afua_4g14840 | Helvolic acid cluster | Transferase family protein [Source:UniProtKB/TrEMBL;Acc:Q4WR23]                                    | jgi-Aspnov1-439543-fgenes1_kg.2_#_1424_#_Locus3740v 1rpk128.06 | 90    |
| Afua_4g14850 | Helvolic acid cluster | Extracellular 3-ketosteroid 1-dehydrogenase, putative [Source:UniProtKB/TrEMBL;Acc:Q4WR24]         | jgi-Aspnov1-118200-CE118199_1683                               | 91.79 |
| AFUA_5G04170 | hsp90                 | Heat shock protein 90 [Source:UniProtKB/Swiss-Prot;Acc:P40292]                                     | jgi-Aspnov1-509883-estExt_fgenes1_pm.C_2_t10392                | 99.27 |
| AFUA_5G08570 | pkaC2                 | cAMP-dependent protein kinase catalytic subunit, putative [Source:UniProtKB/TrEMBL;Acc:E9QXD5]     | jgi-Aspnov1-100079-CE100078_981                                | 95.71 |
| AFUA_5G09240 | cu/zn sod             | Superoxide dismutase [Source:UniProtKB/Swiss-Prot;]                                                | jgi-Aspnov1-501817-estExt_fgenes1_pg.C_2_t20321                | 97.33 |
| AFUA_5G09360 | calA                  | Serine/threonine-protein phosphatase 2B catalytic subunit [Source:UniProtKB/Swiss-Prot;Acc:Q4WUR1] | jgi-Aspnov1-457892-fgenes1_pm.2_#_814                          | 97.59 |
| AFUA_5G09580 | rodA                  | Hydrophobin [Source:UniProtKB/Swiss-Prot;Acc:P41746]                                               | jgi-Aspnov1-402332-estExt_Genewise1.C_2_t40215                 | 96.43 |
| AFUA_5G10760 | mnt1                  | Alpha-1,2-mannosyltransferase (Kre2), putative [Source:UniProtKB/TrEMBL;Acc:Q4WV44]                | jgi-Aspnov1-108431-CE108430_6570                               | 94    |
| AFUA_5G11230 | rasA                  | RAS small monomeric GTPase RasA [Source:UniProtKB/TrEMBL;Acc:E9QX28]                               | jgi-Aspnov1-109419-CE109418_6451                               | 99.53 |
| AFUA_5G13300 | pep1                  | Aspartic protease pep1 [Source:UniProtKB/Swiss-Prot;Acc:P41748]                                    | jgi-Aspnov1-363785-e_gw1.2.2138.1                              | 95.19 |
| AFUA_6G04820 | pabaA                 | Para-aminobenzoate synthase PabaA [Source:UniProtKB/TrEMBL;Acc:Q4WDI0]                             | jgi-Aspnov1-450180-estExt_Genemark1.C_3_t20429                 | 88.47 |
| AFUA_6G09570 | Gliotoxin cluster     | Putative uncharacterized protein [Source:UniProtKB/TrEMBL;Acc:Q4WMK6]                              | jgi-Aspnov1-508952-estExt_fgenes1_pm.C_1_t20245                | 30.19 |
| AFUA_6G09580 | Gliotoxin cluster     | C6 finger domain protein, putative [Source:UniProtKB/TrEMBL;Acc:Q4WMK5]                            | jgi-Aspnov1-511168-estExt_fgenes1_pm.C_3_t20002                | 82.02 |
| AFUA_6G09590 | Gliotoxin cluster     | Zinc alcohol dehydrogenase, putative [Source:UniProtKB/TrEMBL;Acc:Q4WMK4]                          | jgi-Aspnov1-511167-estExt_fgenes1_pm.C_3_t20001                | 84.89 |
| AFUA_6G09600 | Gliotoxin cluster     | Zinc metalloproteinase, putative [Source:UniProtKB/TrEMBL;Acc:Q4WMK3]                              | jgi-Aspnov1-502750-estExt_fgenes1_pg.C_3_t20015                | 90.57 |

|              |                      |                                                                                               |                                                         |       |
|--------------|----------------------|-----------------------------------------------------------------------------------------------|---------------------------------------------------------|-------|
| AFUA_6G09610 | Gliotoxin cluster    | Nonribosomal peptide synthetase 9<br>[Source:UniProtKB/Swiss-Prot;Acc:Q4WMK2]                 | jgi-Aspnov1-404104-<br>estExt_Genewise1.C_3_t30145      | 77.01 |
| AFUA_6G09620 | Gliotoxin cluster    | Putative uncharacterized protein<br>[Source:UniProtKB/TrEMBL;Acc:Q4WMK1]                      | jgi-Aspnov1-386801-<br>estExt_Genewise1Plus.C_3_t30133  | 84.72 |
| AFUA_6G09630 | Gliotoxin cluster    | C6 finger domain protein GliZ<br>[Source:UniProtKB/TrEMBL;Acc:Q4WMK0]                         | jgi-Aspnov1-366288-e_gw1.3.282.1                        | 83.75 |
| AFUA_6G09640 | Gliotoxin cluster    | Aminotransferase GliI<br>[Source:UniProtKB/TrEMBL;Acc:Q4WMJ9]                                 | jgi-Aspnov1-458936-<br>fgenes1_pm.3_#_494               | 87.07 |
| AFUA_6G09650 | Gliotoxin cluster    | Membrane dipeptidase GliJ<br>[Source:UniProtKB/TrEMBL;Acc:Q4WMJ8]                             | jgi-Aspnov1-367031-e_gw1.3.965.1                        | 91.24 |
| AFUA_6G09660 | Gliotoxin cluster    | Nonribosomal peptide synthetase 10<br>[Source:UniProtKB/Swiss-Prot;Acc:Q4WMJ7]                | jgi-Aspnov1-511160-<br>estExt_fgenes1_pm.C_3_t10488     | 92.06 |
| AFUA_6G09670 | Gliotoxin cluster    | Cytochrome P450 oxidoreductase GliC<br>[Source:UniProtKB/TrEMBL;Acc:E9RCR4]                   | jgi-Aspnov1-481241-MIX15903_10_44                       | 92.59 |
| AFUA_6G09680 | Gliotoxin cluster    | O-methyltransferase GliM<br>[Source:UniProtKB/TrEMBL;Acc:Q4WMJ5]                              | jgi-Aspnov1-368520-e_gw1.3.829.1                        | 93.5  |
| AFUA_6G09690 | Gliotoxin cluster    | Glutathione S-transferase GliG<br>[Source:UniProtKB/TrEMBL;Acc:A4GYZ0]                        | jgi-Aspnov1-458931-<br>fgenes1_pm.3_#_489               | 96.25 |
| AFUA_6G09700 | Gliotoxin cluster    | Gliotoxin biosynthesis protein GliK<br>[Source:UniProtKB/TrEMBL;Acc:E9R9Y3]                   | jgi-Aspnov1-429762-<br>fgenes1_pg.3_#_503               | 90.33 |
| AFUA_6G09710 | Gliotoxin cluster    | MFS gliotoxin efflux transporter GliA<br>[Source:UniProtKB/TrEMBL;Acc:E9R876]                 | jgi-Aspnov1-367489-e_gw1.3.2721.1                       | 94.1  |
| AFUA_6G09720 | Gliotoxin cluster    | Methyltransferase GliN<br>[Source:UniProtKB/TrEMBL;Acc:Q4WMJ1]                                | jgi-Aspnov1-502743-<br>estExt_fgenes1_pg.C_3_t20001     | 84.04 |
| AFUA_6G09730 | Gliotoxin cluster    | Cytochrome P450 oxidoreductase GliF<br>[Source:UniProtKB/TrEMBL;Acc:Q4WMJ0]                   | jgi-Aspnov1-458927-<br>fgenes1_pm.3_#_485               | 95.44 |
| AFUA_6G09740 | Gliotoxin cluster    | Thioredoxin reductase GliT<br>[Source:UniProtKB/TrEMBL;Acc:E9RAH5]                            | jgi-Aspnov1-511158-<br>estExt_fgenes1_pm.C_3_t10480     | 91.92 |
| AFUA_6G09745 | Gliotoxin cluster    | Putative uncharacterized protein<br>[Source:UniProtKB/TrEMBL;Acc:Q4WMI8]                      | jgi-Aspnov1-386790-<br>estExt_Genewise1Plus.C_3_t30100  | 89.84 |
| AFUA_6G10240 | fos-1 (tcsA)         | Sensor histidine kinase/response regulator Fos-1/TcsA<br>[Source:UniProtKB/TrEMBL;Acc:Q4WMD9] | jgi-Aspnov1-429720-<br>fgenes1_pg.3_#_461               | 93.36 |
| AFUA_6G11390 | gel2                 | 1,3-beta-glucanosyltransferase gel2<br>[Source:UniProtKB/Swiss-Prot;Acc:POC954]               | jgi-Aspnov1-398517-<br>estExt_Genewise1.C_1_t10227      | 48.38 |
| AFUA_7G04800 | gprC                 | Putative uncharacterized protein<br>[Source:UniProtKB/TrEMBL;Acc:Q4WGE9]                      | jgi-Aspnov1-462935-<br>fgenes1_pm.7_#_220               | 94.32 |
| AFUA_8G00170 | Fumitremorin cluster | Nonribosomal peptide synthetase 13<br>[Source:UniProtKB/Swiss-Prot;Acc:Q4WAW3]                | jgi-Aspnov1-507323-<br>estExt_fgenes1_pg.C_90140        | 34.91 |
| AFUA_8G00190 | Fumitremorin cluster | Cytochrome P450, putative<br>[Source:UniProtKB/TrEMBL;Acc:Q4WAW5]                             | jgi-Aspnov1-510751-<br>estExt_fgenes1_pm.C_3_t10008     | 64.49 |
| AFUA_8G00200 | Fumitremorin cluster | O-methyltransferase, putative<br>[Source:UniProtKB/TrEMBL;Acc:Q4WAW6]                         | jgi-Aspnov1-449391-<br>estExt_Genemark1.C_3_t10007      | 71.39 |
| AFUA_8G00210 | Fumitremorin cluster | Dimethylallyl tryptophan synthase FtmPT1<br>[Source:UniProtKB/TrEMBL;Acc:Q4WAW7]              | jgi-Aspnov1-396938-<br>estExt_Genewise1Plus.C_10_t10291 | 35.94 |
| AFUA_8G00220 | Fumitremorin cluster | Cytochrome P450, putative<br>[Source:UniProtKB/TrEMBL;Acc:Q4WAW8]                             | jgi-Aspnov1-479619-MIX14281_2_12                        | 44.02 |
| AFUA_8G00230 | Fumitremorin cluster | Phytanoyl-CoA dioxygenase family protein<br>[Source:UniProtKB/TrEMBL;Acc:Q4WAW9]              | jgi-Aspnov1-404130-<br>estExt_Genewise1.C_3_t30177      | 33.3  |
| AFUA_8G00240 | Fumitremorin cluster | Cytochrome P450 monooxygenase, putative<br>[Source:UniProtKB/TrEMBL;Acc:Q4WAX0]               | jgi-Aspnov1-419348-gm1.3695_g                           | 42.5  |
| AFUA_8G00250 | Fumitremorin cluster | Dimethylallyl tryptophan synthase, putative<br>[Source:UniProtKB/TrEMBL;Acc:Q4WAX1]           | jgi-Aspnov1-463437-<br>fgenes1_pm.8_#_19                | 57.76 |
| AFUA_8G00260 | Fumitremorin cluster | F-box domain and ankyrin repeat protein<br>[Source:UniProtKB/TrEMBL;Acc:Q4WAX2]               | jgi-Aspnov1-516072-<br>estExt_fgenes1_pm.C_100234       | 27.92 |
| AFUA_8G00370 | Fumagillin cluster   | Polyketide synthase, putative<br>[Source:UniProtKB/TrEMBL;Acc:Q4WAY3]                         | jgi-Aspnov1-424178-gm1.8525_g                           | 84.34 |



|              |                    |                                                                                         |                                                            |       |
|--------------|--------------------|-----------------------------------------------------------------------------------------|------------------------------------------------------------|-------|
| AFUA_8G00380 | Fumagillin cluster | DltD N-terminal domain protein [Source:UniProtKB/TrEMBL;Acc:Q4WAY4]                     | jgi-Aspnov1-412667-estExt_Genewise1.C_8_t10092             | 96.92 |
| AFUA_8G00390 | Fumagillin cluster | O-methyltransferase, putative [Source:UniProtKB/TrEMBL;Acc:Q4WAY5]                      | jgi-Aspnov1-463456-fgenes1_pm.8_#_38                       | 96.77 |
| AFUA_8G00400 | Fumagillin cluster | Putative uncharacterized protein [Source:UniProtKB/TrEMBL;Acc:Q4WAY6]                   | jgi-Aspnov1-463456-fgenes1_pm.8_#_38                       | 85.06 |
| AFUA_8G00410 | Fumagillin cluster | Methionine aminopeptidase 2-1 [Source:UniProtKB/Swiss-Prot;Acc:Q4WAY7]                  | jgi-Aspnov1-463457-fgenes1_pm.8_#_39                       | 91.48 |
| AFUA_8G00420 | Fumagillin cluster | C6 finger transcription factor, putative [Source:UniProtKB/TrEMBL;Acc:Q4WAY8]           | jgi-Aspnov1-434405-fgenes1_pg.8_#_51                       | 86.95 |
| AFUA_8G00430 | Fumagillin cluster | Putative uncharacterized protein [Source:UniProtKB/TrEMBL;Acc:Q4WAY9]                   | jgi-Aspnov1-412676-estExt_Genewise1.C_8_t10101             | 95.54 |
| AFUA_8G00440 | Fumagillin cluster | Steroid monooxygenase, putative [Source:UniProtKB/TrEMBL;Acc:Q4WAZ0]                    | jgi-Aspnov1-434407-fgenes1_pg.8_#_53                       | 87.4  |
| AFUA_8G00460 | Fumagillin cluster | Methionine aminopeptidase [Source:UniProtKB/TrEMBL;Acc:Q4WAZ1]                          | jgi-Aspnov1-463462-fgenes1_pm.8_#_44                       | 96.22 |
| AFUA_8G00470 | Fumagillin cluster | Putative uncharacterized protein [Source:UniProtKB/TrEMBL;Acc:Q4WAZ2]                   | jgi-Aspnov1-395381-estExt_Genewise1Plus.C_8_t10105         | 85.82 |
| AFUA_8G00480 | Fumagillin cluster | Phytoanyl-CoA dioxygenase family protein [Source:UniProtKB/TrEMBL;Acc:Q4WAZ3]           | jgi-Aspnov1-445026-fgenes1_kg.8_#_46_#_Locus3448v1rpk31.50 | 94.01 |
| AFUA_8G00490 | Fumagillin cluster | PKS-like enzyme, putative [Source:UniProtKB/TrEMBL;Acc:Q4WAZ4]                          | jgi-Aspnov1-445027-fgenes1_kg.8_#_47_#_Locus11024v1rpk1.79 | 72.1  |
| AFUA_8G00500 | Fumagillin cluster | Acetate-CoA ligase, putative [Source:UniProtKB/TrEMBL;Acc:Q4WAZ5]                       | jgi-Aspnov1-412687-estExt_Genewise1.C_8_t10112             | 92.09 |
| AFUA_8G00510 | Fumagillin cluster | Cytochrome P450 oxidoreductase OrdA-like, putative [Source:UniProtKB/TrEMBL;Acc:Q4WAZ6] | jgi-Aspnov1-412689-estExt_Genewise1.C_8_t10114             | 94.03 |
| AFUA_8G00520 | Fumagillin cluster | Integral membrane protein [Source:UniProtKB/TrEMBL;Acc:Q4WAZ7]                          | jgi-Aspnov1-377876-e_gw1.8.1481.1                          | 91.23 |
| AFUA_8G02750 | cgrA               | rRNA-processing protein cgrA [Source:UniProtKB/Swiss-Prot;Acc:Q9HEQ8]                   | jgi-Aspnov1-454324-estExt_Genemark1.C_8_t10302             | 95    |

Table S4 Table of the terrequinone proteins from *A. nidulans* and the BLASTP hits found in *A. steynii*.

| <i>A. Nidulans</i><br>terrequinone proteins | Hit protein ID in<br><i>A. steynii</i> | % Identity | % Coverage |
|---------------------------------------------|----------------------------------------|------------|------------|
| TdiA - ABU51602.1                           | 365047                                 | 71.7       | 101        |
| tdiB - ABU51603.1                           | 415228                                 | 56.2       | 92         |
| tdiC - ABU51604.1                           | 429405                                 | 52.7       | 88.6       |
| tdiD - ABU51605.1                           | 479193                                 | 69.5       | 96.1       |
| tdiE - ABU51606.1                           | 365428                                 | 56.1       | 97.7       |

**Table S5**

Part 1 Overview of chlorinating enzymes identified from literature. The sequence of each of these proteins were used to search for similar proteins in *A. campestris*, *A. candidus* and *A. taichungensis* using BLASTP comparison, but no hits were found.

| Protein | Description                                                                                    | Reference | GenBank    | <i>A. campestris</i> | <i>A. candidus</i> | <i>A. taichungensis</i> |
|---------|------------------------------------------------------------------------------------------------|-----------|------------|----------------------|--------------------|-------------------------|
| CmaB    | a chlorinating non-haem iron enzyme from <i>Pseudomonas syringae</i>                           | [1]       | AAC46036.1 | No hits              | No hits            | No hits                 |
| PrnA    | a flavin dependent tryptophan halogenase from <i>Pseudomonas fluorescens</i>                   | [2]       | AAB97504.1 | No hits              | No hits            | No hits                 |
| PtaM    | a flavin dependent halogenase from <i>Pestalotiopsis fici</i>                                  | [3]       | AGO59046.1 | No hits              | No hits            | No hits                 |
| Thr3    | an iron non heme alpha ketoglutarate dependent halogenase from <i>Streptomyces</i> sp. OH-5093 | [4]       | CCF23457.1 | No hits              | No hits            | No hits                 |

Part 2 Relevant InterPro domains identified by comparing the proteins listed in Suppl. Table 6 to the InterPro database using InterProScan 5 [5] and an additional word search of the database [6]. The identified InterPro domains were searched for in the annotated *A. campestris*, *A. candidus* and *A. taichungensis* genomes including the number of hits.

| IPR ID    | Description                                  | Hits<br><i>A. campestris</i> | Hits<br><i>A. candidus</i> | Hits<br><i>A. taichungensis</i> |
|-----------|----------------------------------------------|------------------------------|----------------------------|---------------------------------|
| IPR000028 | Chloroperoxidase Heme dependent              | 4                            | 4                          | 4                               |
| IPR001568 | Ribonuclease T2                              | 3                            | 2                          | 2                               |
| IPR008775 | Phytanoyl-CoA dioxygenase                    | 5                            | 5                          | 4                               |
| IPR010092 | chlorinating enzyme FE(II)nonheme halogenase | 0                            | 0                          | 0                               |
| IPR006905 | tryptophan halogenase                        | 0                            | 0                          | 0                               |
| IPR002747 | SAM depend chlorinase/fluorinase             | 0                            | 0                          | 0                               |
| IPR016119 | bromoperoxidase/chloroperoxidase C-terminal  | 0                            | 0                          | 0                               |

Part 3 Overview of the potential chlorinating proteins in the chlorflavonin candidate cluster in *A. campestris* including the best BLASTP hit in NCBI nr database and the identified InterPro IDs found using InterPro Scan 5 [5] on the protein sequences.

| Protein ID | BLAST hit                                                                                               | InterPro Scan hit                                                               |
|------------|---------------------------------------------------------------------------------------------------------|---------------------------------------------------------------------------------|
| 286063     | Hypothetical protein [Solirubrobacterales bacterium URHD0059] 93% coverage and 36% identity             | IPR029039 – flavoprotein-like<br>IPR005025 – NADPH-dependent FMN reductase-like |
| 277538     | Related to scytalone dehydratase [ <i>Fusarium fujikuroi</i> IMI 58289], 100% coverage and 53% identity | IPR004235 – Scytalone dehydratase                                               |

|        |                                                                                                                                                                                                                  |                                                                                                                                                             |
|--------|------------------------------------------------------------------------------------------------------------------------------------------------------------------------------------------------------------------|-------------------------------------------------------------------------------------------------------------------------------------------------------------|
| 331187 | Peptidase S15/CocE/NonD, C-terminal [Penicillium expansum] 97% coverage and 41% Identity                                                                                                                         | IPR011008 Dimeric alpha-beta barrel                                                                                                                         |
| 3988   | Hypothetical protein HIM_08269 [Hirsutella minnesotensis 3608]<br>98% coverage and 53% Identity<br>3-hydroxybenzoate 6-hydroxylase 1 [Tolypocladium ophioglossoides CBS 100239]<br>98% coverage and 53% Identity | IPR006076 –FAD dependent oxidoreductase<br>IPR003042 – Aromatic-ring hydroxylase<br>IPR023753 – FAD/NAD(P) binding domain<br>IPR002938 – FAD-binding domain |

- Vaillancourt FH, Yeh E, Vosburg D a, O'Connor SE, Walsh CT. Cryptic chlorination by a non-haem iron enzyme during cyclopropyl amino acid biosyn. *Nature*. 2005;436:1191–4. <http://www.nature.com/nature/journal/v436/n7054/pdf/nature03797.pdf>. Accessed 3 Nov 2015.
- Kirner S, Hammer PE, Hill DS, Altmann A, Fischer I, Weislo LJ, et al. Functions Encoded by Pyrrolnitrin Biosynthetic Genes from *Pseudomonas fluorescens*. *J Bacteriol*. 1998;180:1939–43. <http://jb.asm.org.proxy.findit.dtu.dk/content/180/7/1939>. Accessed 3 Nov 2015.
- Xu X, Liu L, Zhang F, Wang W, Li J, Guo L, et al. Identification of the first diphenyl ether gene cluster for pesthelic acid biosynthesis in plant endophyte *Pestalotiopsis fici*. *Chembiochem*. 2014;15:284–92. doi:10.1002/cbic.201300626.
- Fullone MR, Paiardini A, Miele R, Marsango S, Gross DC, Omura S, et al. Insight into the structure-function relationship of the nonheme iron halogenases involved in the biosynthesis of 4-chlorothreonine --Thr3 from *Streptomyces* sp. OH-5093 and SyrB2 from *Pseudomonas syringae* pv. *syringae* B301DR. *FEBS J*. 2012;279:4269–82. doi:10.1111/febs.12017.
- Jones P, Binns D, Chang H-Y, Fraser M, Li W, McAnulla C, et al. InterProScan 5: genome-scale protein function classification. *Bioinformatics*. 2014;30:1236–40. doi:10.1093/bioinformatics/btu031.
- Mitchell A, Chang H-Y, Daugherty L, Fraser M, Hunter S, Lopez R, et al. The InterPro protein families database: the classification resource after 15 years. *Nucleic Acids Res*. 2014;43:D213-221. doi:10.1093/nar/gku1243.
